# Supplementary material for: Facile and scalable production of three-dimensional spherical carbonized bacterial cellulose/graphene nanocomposites with a honeycomb-like surface pattern as potential superior absorbents
Source: Royal Society of Chemistry journal article supplement (doi:10.1039/c5ta07464a), 2015-01-01
Supplement: c5ta07464a3.pdf [file c5ta07464a3.pdf]

## Supporting Information

### **Facile and scalable production of three-dimensional spherical carbonized bacterial cellulose/graphene nanocomposites with honeycomb-like surface pattern as potential superior absorbents**

Yizao Wan <sup>a,b</sup>, Fangshan Zhang <sup>b</sup>, Chunzhi Li <sup>a</sup>, Guangyao Xiong <sup>a,\*</sup>, Yong Zhu <sup>c</sup>,  
Honglin Luo <sup>a,b,\*</sup>

<sup>a</sup> *Institute for Biomaterials and Transportation, East China Jiaotong University, Nanchang 330013, China*

<sup>b</sup> *School of Materials Science and Engineering, Tianjin University, Tianjin 300072, China*

<sup>c</sup> *School of Chemical Engineering, Tianjin University, Tianjin 300072, China*

\*Corresponding authors.

Guangyao Xiong:

E-mail address: xionguangyao@163.com; Fax & Tel: +86 791 8704 6122

Honglin Luo:

E-mail address: hlluotju@126.com; Tel: +86 22 2740 3045; Fax: +86 22 2740 4724

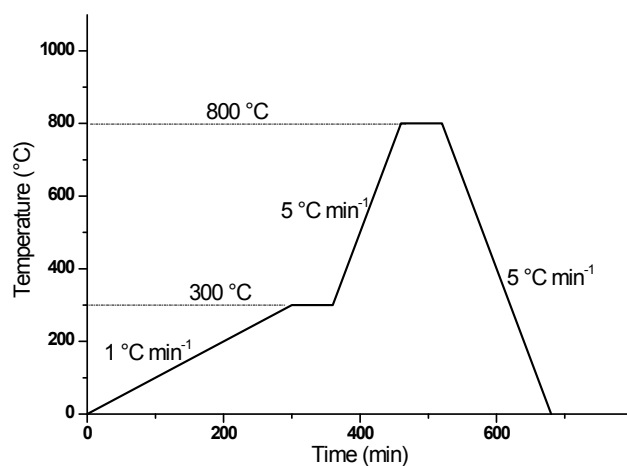

**Fig. S1** Optimum heating and cooling processes and conditions used for the calcination of bacterial cellulose.

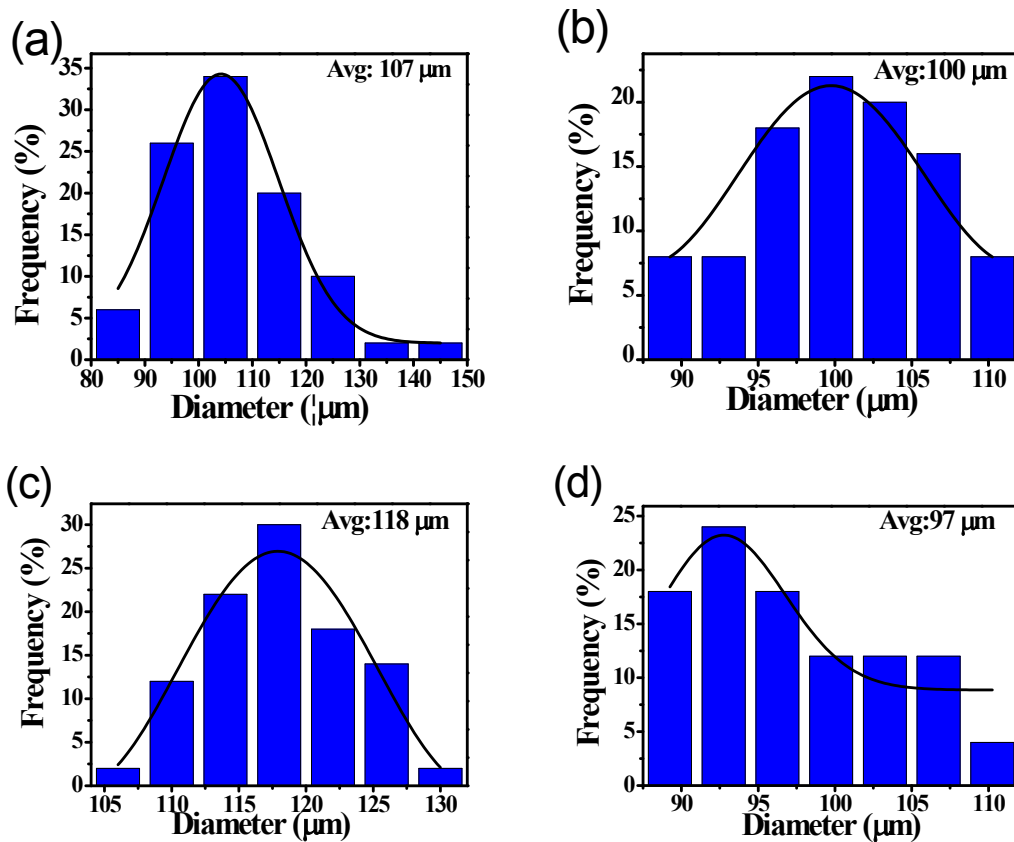

**Fig. S2** Cavity size distribution of SBC (a), SBC/GE (b), SCBC (c), and SCBC/GE (d).

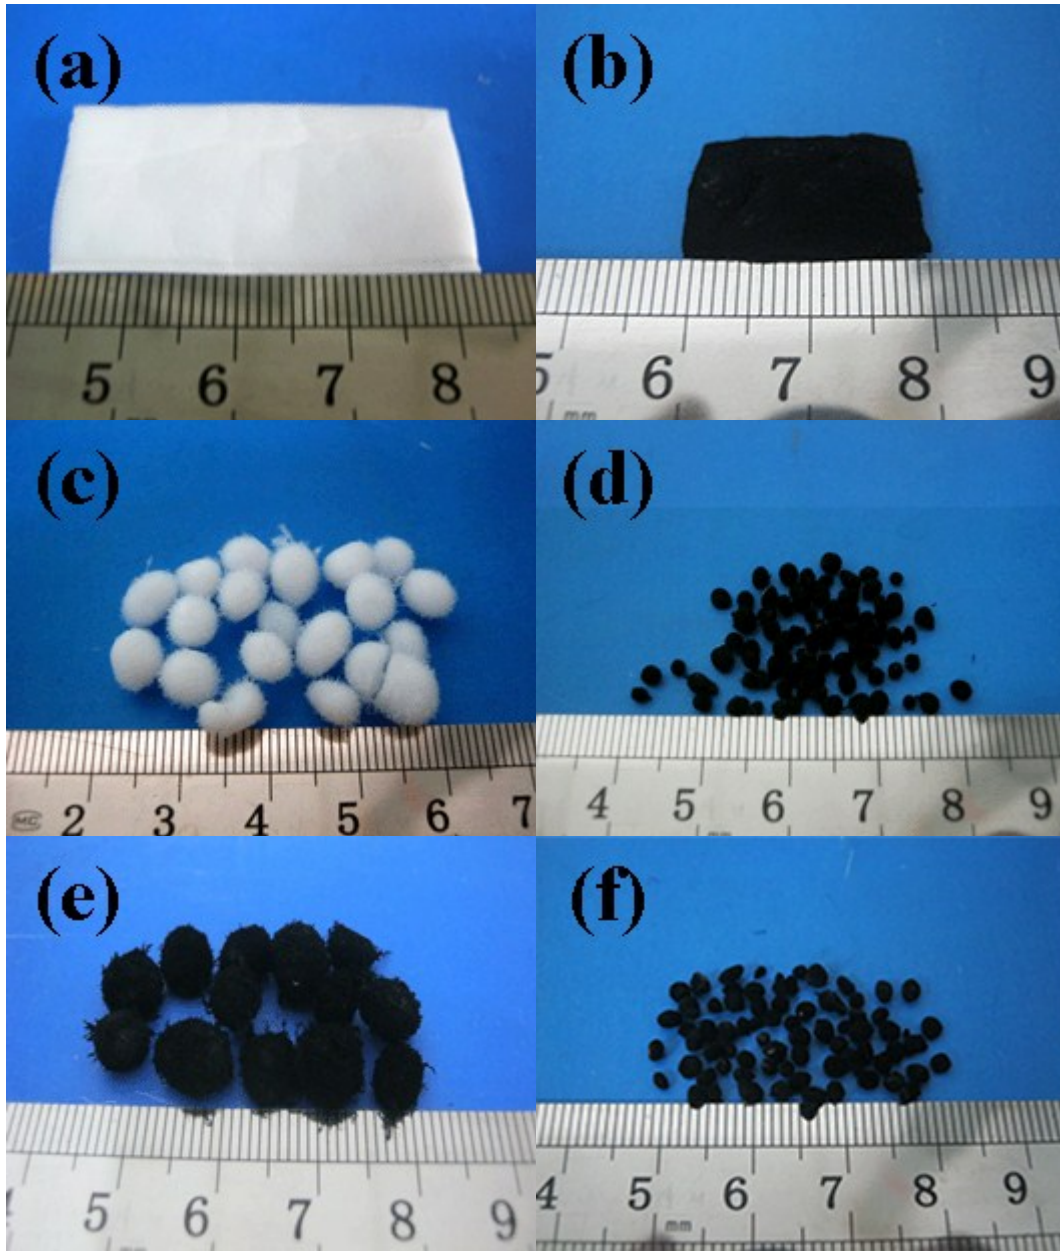

**Fig. S3** Digital photos of BC (a), CBC (b), SBC (c), SCBC (d), SBC/GE (e), and SCBC/GE (f).

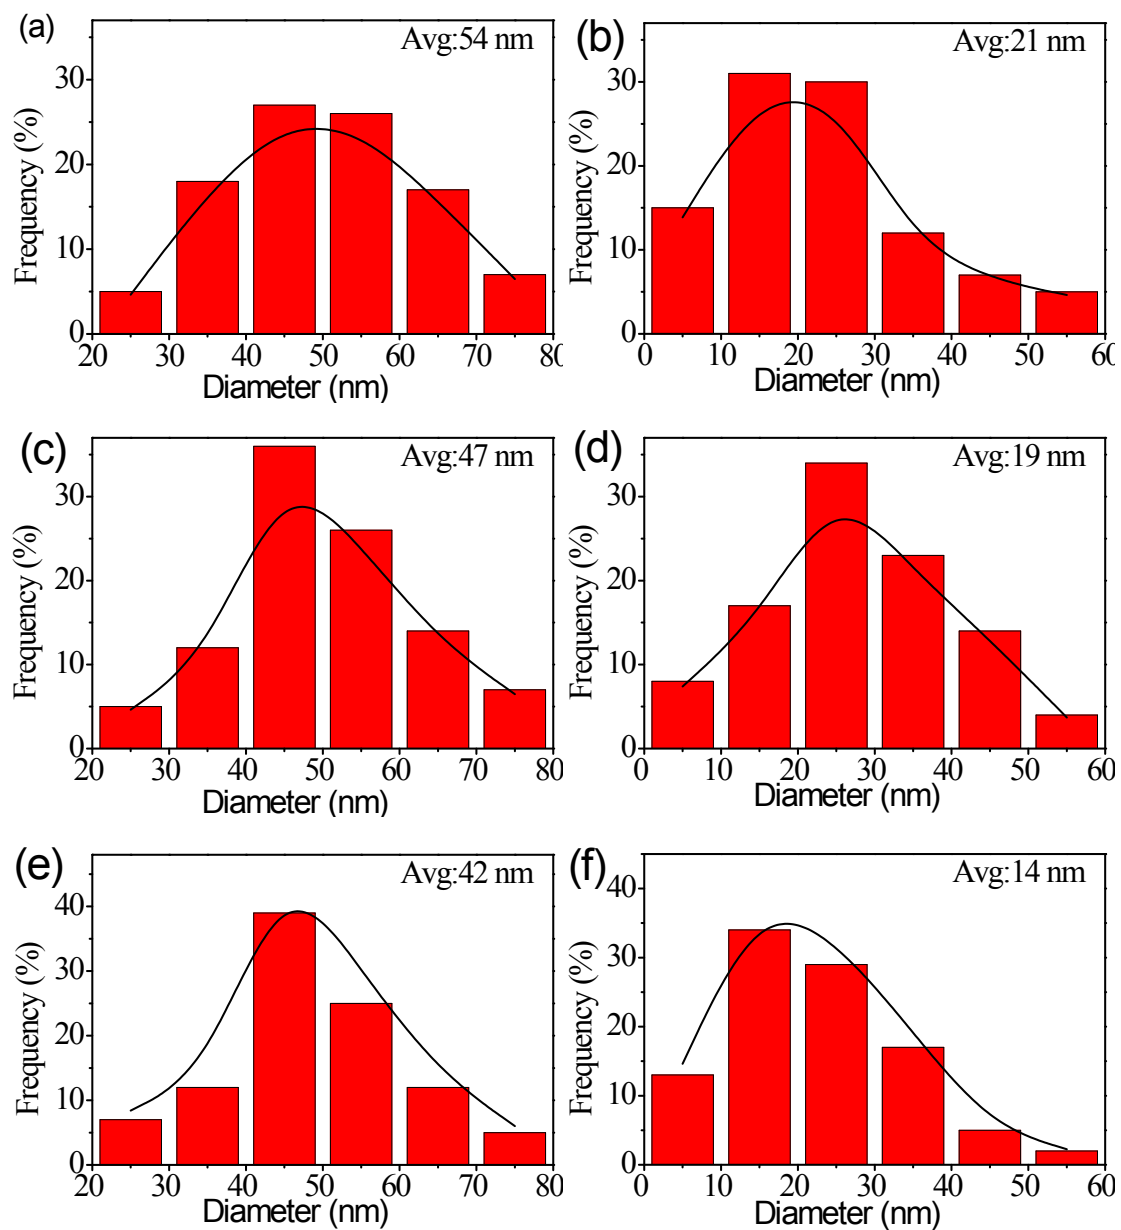

**Fig. S4** Fiber diameter distribution of BC (a), CBC (b), SBC (c), SCBC (d), SBC/GE, and SCBC/GE (f).

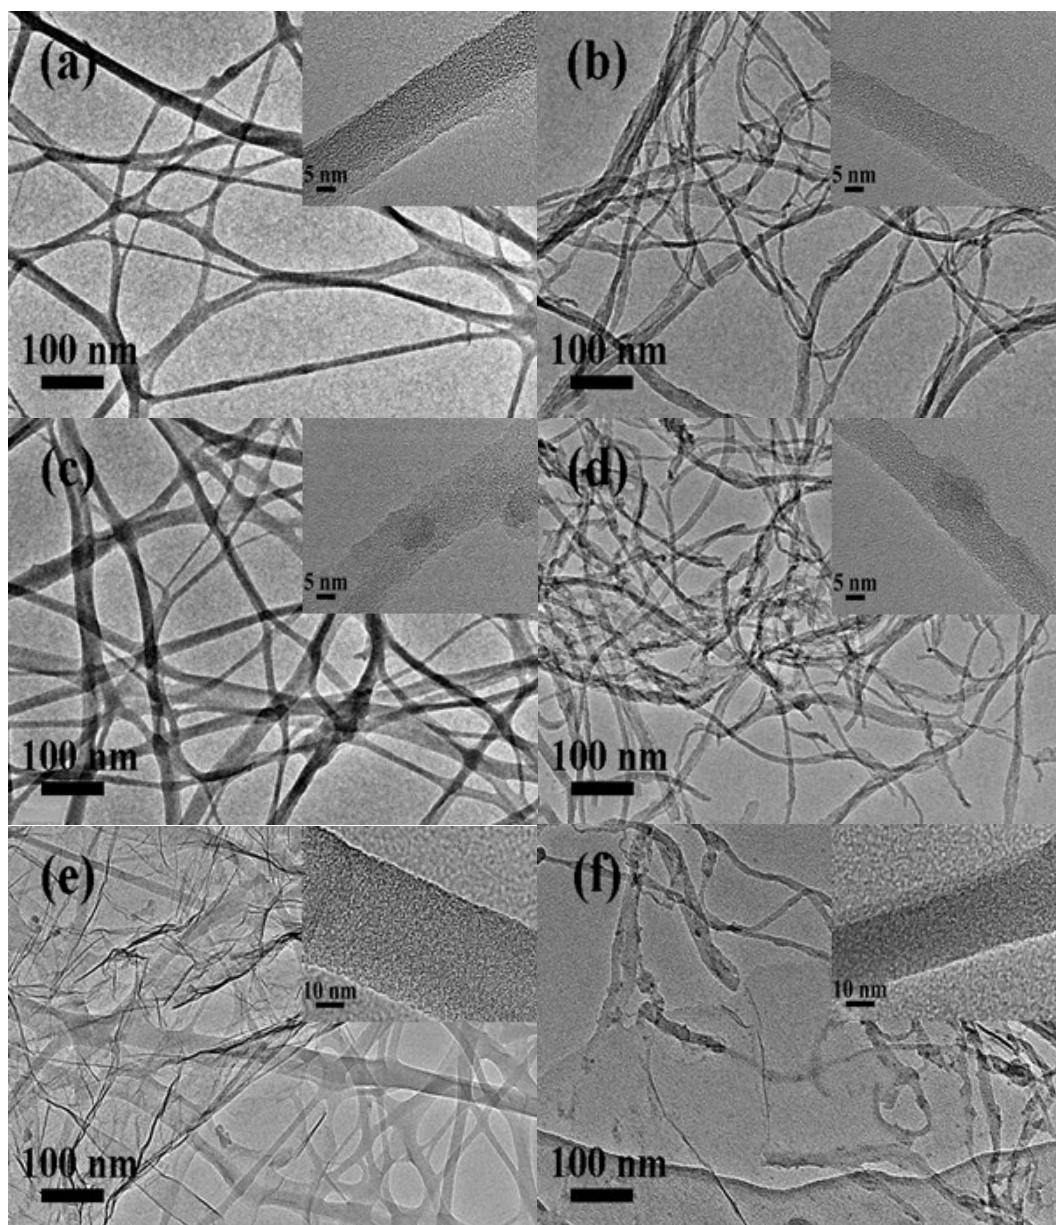

**Fig. S5** TEM images of BC (a), CBC (b), SBC (c), SCBC (d), SBC/GE (e), and SCBC/GE (f) (insets showing corresponding HRTEM images of individual nanofibers).

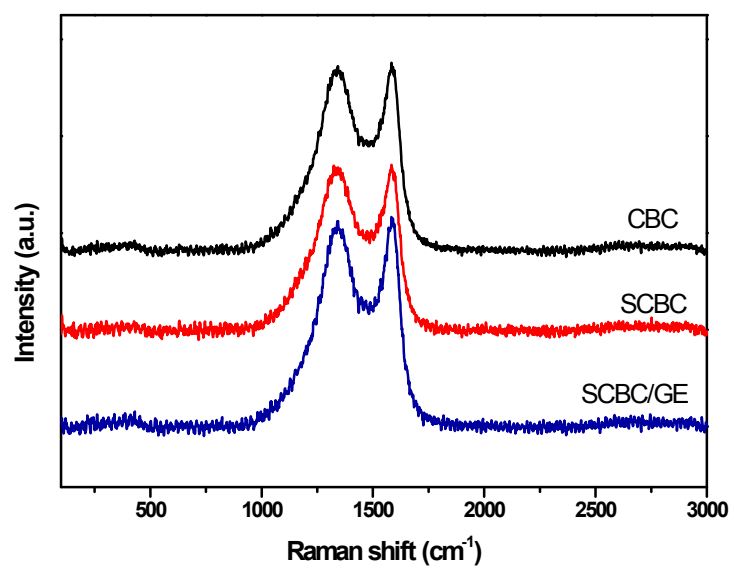

Fig. S6 Raman spectra of CBC, SCBC, and SCBC/GE.
